# PHLPP negatively regulates cell motility through inhibition of Akt activity and integrin expression in pancreatic cancer cells

Alena J. Smith<sup>1,2</sup>, Yang-An Wen<sup>1</sup>, Payton D. Stevens<sup>1,2</sup>, Jingpeng Liu<sup>1</sup>, Chi Wang<sup>1</sup>, Tianyan Gao<sup>1,2</sup>

<sup>1</sup>Markey Cancer Center, University of Kentucky, Lexington, KY, USA

<sup>2</sup>Department of Molecular and Cellular Biochemistry, University of Kentucky, Lexington, KY, USA

Correspondence to: Tianyan Gao, e-mail: tianyan.gao@uky.edu

Keywords: pancreatic cancer, cell migration, tumor suppressor, PHLPP, integrin

Received: August 06, 2015

Accepted: January 01, 2016

Published: January 08, 2016

## ABSTRACT

**Pancreatic adenocarcinoma is currently the fourth leading cause for cancer-related mortality. Malignant progression of pancreatic cancer depends not only on rapid proliferation of tumor cells but also on increased cell motility. In this study, we showed that increased PHLPP expression significantly reduced the rate of migration in pancreatic ductal adenocarcinoma (PDAC) cells whereas knockdown of PHLPP had the opposite effect. In addition, cell motility at the individual cell level was negatively regulated by PHLPP as determined using time-lapse imaging. Interestingly, the expression of  $\beta 1$  and  $\beta 4$  integrin proteins were decreased in PHLPP overexpressing cells and increased in PHLPP knockdown cells whereas the mRNA levels of integrin were not altered by changes in PHLPP expression. In determining the molecular mechanism underlying PHLPP-mediated regulation of integrin expression, we found that inhibition of lysosome activity rescued integrin expression in PHLPP overexpressing cells, thus suggesting that PHLPP negatively controls cell motility by inhibiting Akt activity to promote lysosome-dependent degradation of integrins. Functionally, the increased cell migration observed in PHLPP knockdown cells was effectively blocked by the neutralizing antibodies against  $\beta 1$  or  $\beta 4$  integrin. Taken together, our study identified a tumor suppressor role of PHLPP in suppressing cell motility by negatively regulating integrin expression in pancreatic cancer cells.**

## INTRODUCTION

Pancreatic adenocarcinoma is the fourth leading cause of cancer related deaths in the United States, despite being the ninth most diagnosed cancer in men and the eleventh in women. PDAC arises from the exocrine portion of the pancreas and accounts for 95% of all pancreatic adenocarcinoma [1]. PDAC has a dismal 5-year survival rate of 4% and a median survival span of 6 months from the point of diagnosis, and it has a high rate of chemotherapy and radiation resistance [1]. Thus, a better understanding of the molecular events leading to cancer progression is needed in order to improve the treatment and prognosis of PDAC patients.

Accumulation of genetic mutations in oncogenes and tumor suppressors lead to the development of pre-malignant lesions which eventually through genetic instability give rise to carcinoma within the pancreatic ductal epithelium [2].

Key mutations in oncogenes such as *KRAS* with deactivation of tumor suppressor genes *SMAD4* and *CDKN2A/INK4A* have been implicated in the development and progression of pancreatic cancer [3, 4]. In addition, it has been shown that overexpression of integrin  $\alpha 6 \beta 4$  promotes migration and invasion of pancreatic cancer cells and is associated with the progression of PDAC [5, 6]. Integrins are known to contribute to tumor progression and metastasis by directly activating a number of oncogenic signaling pathways, including PI3K/Akt and RAS/RAF pathways, in various types of cancer [7, 8]. However, the molecular mechanism by which the expression of integrin proteins is regulated remains elusive in pancreatic cancer cells.

PHLPP (PH domain leucine-rich repeat protein phosphatase) belongs to a novel family of Ser/Thr protein phosphatases. There are two isoforms, PHLPP1 and PHLPP2, identified in this family [9–12]. Both PHLPP isoforms were first discovered as the phosphatases for

Akt that directly dephosphorylate the hydrophobic motif Ser473 site and inactivate the kinase [9, 10]. Moreover, it has been shown that PHLPP dephosphorylates Ser338, a key activation site on RAF1, and inhibits the downstream signaling through RAF/MEK/ERK in colon cancer cells [13]. Therefore, PHLPP may exert its tumor suppressor function by negatively regulating both the PI3K/Akt and RAS/RAF pathways. Recently, Nitsche et al discovered that there is a stage-dependent downregulation of PHLPP in pancreatic cancer patient specimens, thus suggesting a tumor suppressor role of PHLPP in pancreatic cancer [14]. However, it remains unknown whether loss of PHLPP expression promotes cancer cell migration in pancreatic cancer.

In this study, we determined the role of PHLPP in regulating cell migration and motility in pancreatic cancer cells. We identified a functional connection between PHLPP expression and integrin function. Results from our study revealed that PHLPP-loss increases cell motility by upregulating integrin expression and inducing EMT. Furthermore, we found that PHLPP negatively controls integrin expression by

promoting lysosome-mediated degradation of integrin via inhibition of Akt.

## RESULTS

### PHLPP negatively regulates the activity of Akt and MEK/ERK in pancreatic cells

To determine if PHLPP serves as a tumor suppressor in human pancreatic cancer, we established stable cell lines overexpressing PHLPP1 or PHLPP2 in Panc-1 cells, which express very low levels of endogenous PHLPPs. The PHLPP1 gene potentially encodes two differentially spliced variants, PHLPP1 $\alpha$  and PHLPP1 $\beta$  [11]. Since the longer transcript of PHLPP1, PHLPP1 $\beta$ , is the predominant form expressed endogenously in all pancreatic cell lines examined, we used PHLPP1 $\beta$  in our study. We first determined the effect of PHLPP overexpression on cell signaling. As shown in Figure 1, both Akt and MEK/ERK activity were downregulated in PHLPP overexpressing cells compared to control cells as indicated by decreased

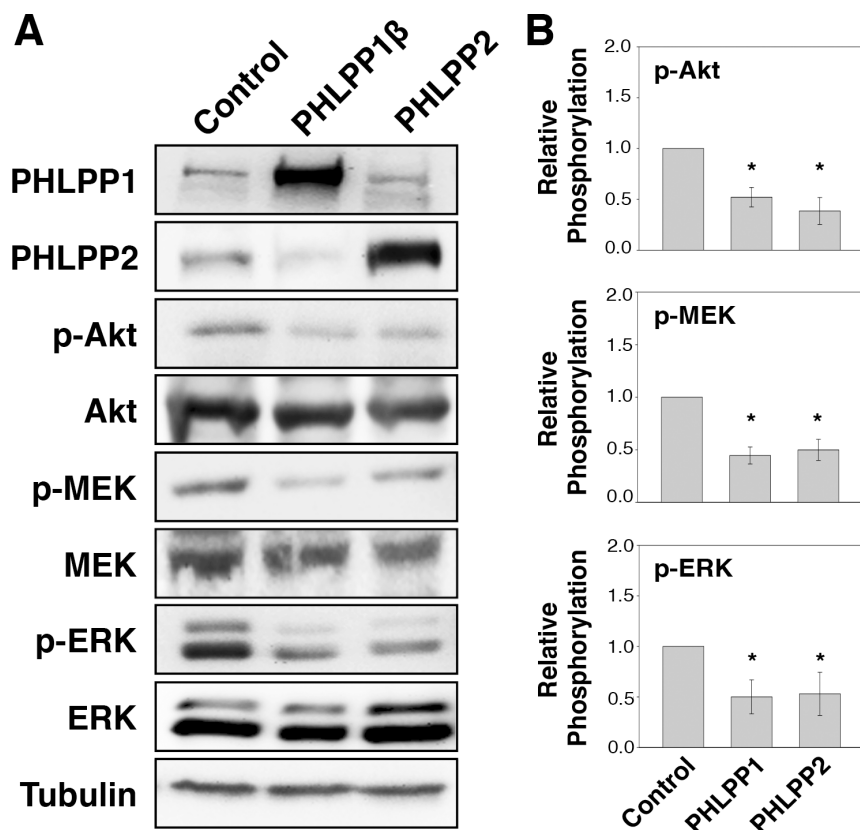

**Figure 1: Overexpression of PHLPP isoforms inhibit PI3K/Akt and MEK/ERK signaling.** A. Stable control, HA-PHLPP1 $\beta$  or HA-PHLPP2 overexpressing Panc-1 cells were generated using retrovirus-mediated infection. The cell lysates were prepared and analyzed for phosphorylation and total protein expression by immunoblotting. B. Relative phosphorylation for p-Akt, p-MEK, p-ERK were calculated and normalized to those of total Akt, MEK and ERK, respectively. The level in control cells was set to 1. Data represent the mean  $\pm$  SEM ( $n = 3$ , \*  $p < 0.05$  by two-sample  $t$ -tests).

phosphorylation of Akt, MEK, and ERK. Next, to determine the effect of endogenous PHLPP on Akt and MEK/ERK signaling, PHLPP was silenced in ASPC-1 cells, which express relatively higher levels of endogenous PHLPPs, using lentiviral-mediated RNAi. Immunoblotting results revealed that phosphorylation of Akt, MEK, and ERK was significantly elevated when PHLPP expression was knocked down (Figure 2). Consistent with previous reports on the tumor suppressor function of PHLPP in other cancer types [13, 15–18], our results here provide the initial evidence that PHLPP is capable of inhibiting both Akt and MEK/ERK signaling in pancreatic cancer cells.

### PHLPP negatively regulates cell migration in pancreatic cancer cells

Previous studies of PHLPP expression in colorectal cancer cells showed an enhanced ability for PHLPP knockdown cells to migrate and transition into EMT [13]. To test if PHLPP regulates cell motility in pancreatic cancer cells, we first examined the

expression of EMT markers in PHLPP overexpressing Panc-1 and PHLPP knockdown ASPC-1 cells. As shown in Figure 3A, PHLPP overexpression markedly increased the expression of E-cadherin, an epithelial cell marker, and decreased the expression of vimentin, a mesenchymal cell marker. Conversely, knockdown of either PHLPP isoform decreased E-cadherin whereas increased vimentin expression (Figure 3A), suggesting that PHLPP downregulation promotes EMT in pancreatic cancer cells. Furthermore, we found that PHLPP overexpressing cells migrated significantly slower than the control cells as determined by Transwell migration assays (Figure 3B). In contrast, knockdown of PHLPP significantly enhanced the ability of pancreatic cancer cells to migrate in response to HGF. Similar results were obtained when using IGF-1 and collagen were used as chemoattractants (Supplementary Figure S1).

We next determined the effect of PHLPP on modulating cell motility at the single cell level. To this end, PHLPP overexpressing Panc-1 and PHLPP knockdown ASPC-1 cells were subjected to cell

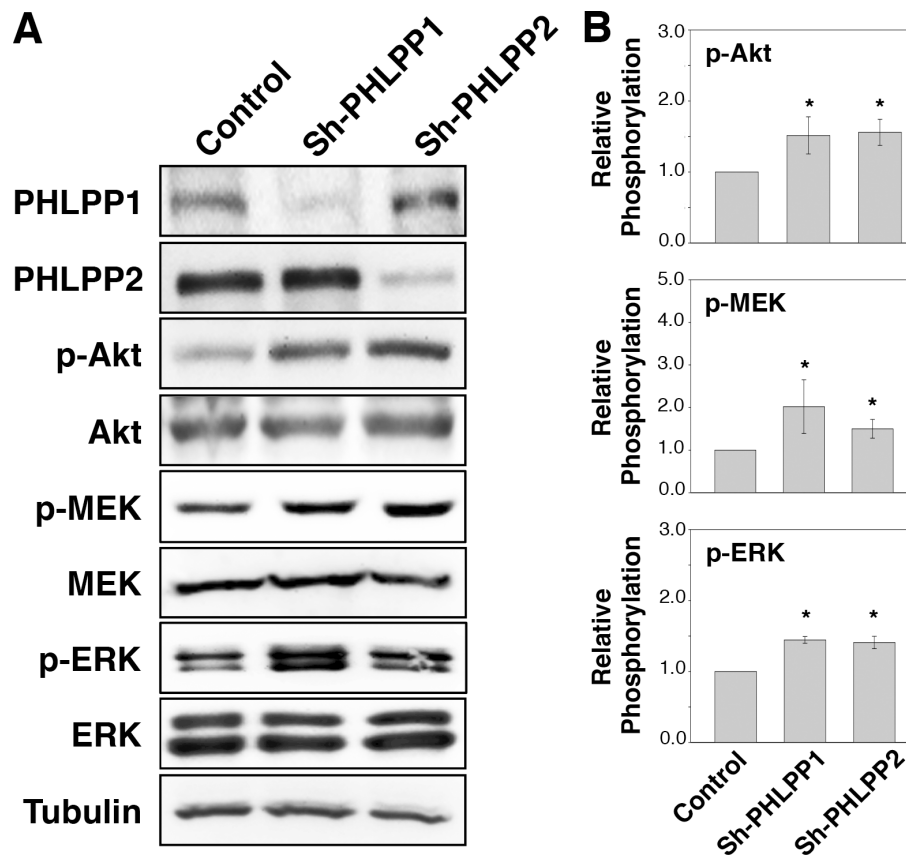

**Figure 2: Loss of PHLPP expression enhances PI3K/Akt and MEK/ERK signaling.** A. Stable control (sh-Con) and PHLPP knockdown (sh-PHLPP1 and sh-PHLPP2) ASPC-1 cells were generated using lentivirus-mediated RNAi. The cell lysates were analyzed for phosphorylation and total protein expression by immunoblotting. B. Relative phosphorylation for p-Akt, p-MEK, p-ERK were calculated and normalized to those of total Akt, MEK and ERK, respectively. The level in control cells was set to 1. Data represent the mean  $\pm$  SEM ( $n = 3$ , \*  $p < 0.05$  by two-sample  $t$ -tests).

tracking experiments to monitor the cell movement in real time. We found that overexpression of PHLPP resulted in a significant decrease in cell motility when compared to the control cells (Figure 4A), whereas PHLPP knockdown cells were considerably more motile (Figure 4D). The velocity and average distances

traveled were significantly decreased in PHLPP overexpressing cells (Figure 4B–4C) while significantly increased in PHLPP knockdown cells (Figure 4E–4F). Taken together, we have identified a role of PHLPP in inhibiting EMT and cell motility in pancreatic cancer cells.

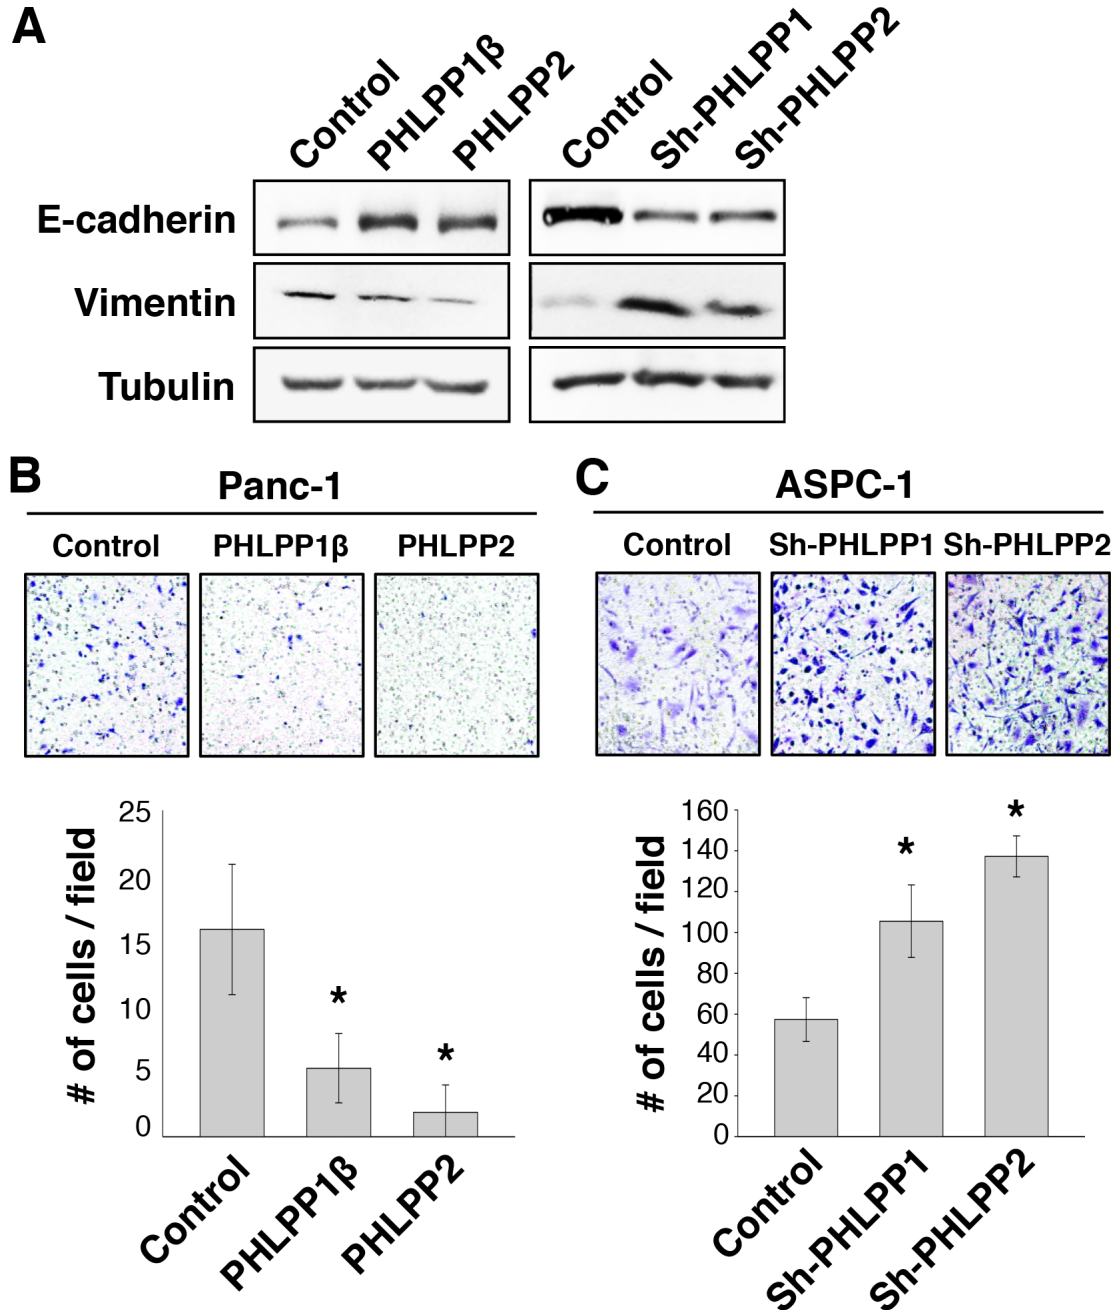

**Figure 3: Knockdown of PHLPP expression induces EMT and promotes cell migration.** A. Cell lysates were prepared from stable control and PHLPP overexpressing Panc-1 as well as PHLPP knockdown ASPC-1 cells. The expression levels of E-cadherin and vimentin were analyzed using immunoblotting. B. Stable control and PHLPP overexpressing Panc-1 cells were subjected to Transwell migration assays using HGF and laminin as chemoattractants. C. Stable control and PHLPP knockdown ASPC-1 cells were subjected to Transwell migration assays using HGF and laminin as chemoattractants. The inserts shown in (B) and (C) were representative images of cells migrated in the Transwell assays. Each experiment was done in duplicates and three independent experiments were averaged and expressed as mean  $\pm$  SEM (\*  $p < 0.05$  by two-sample  $t$ -tests compared to the control cells).

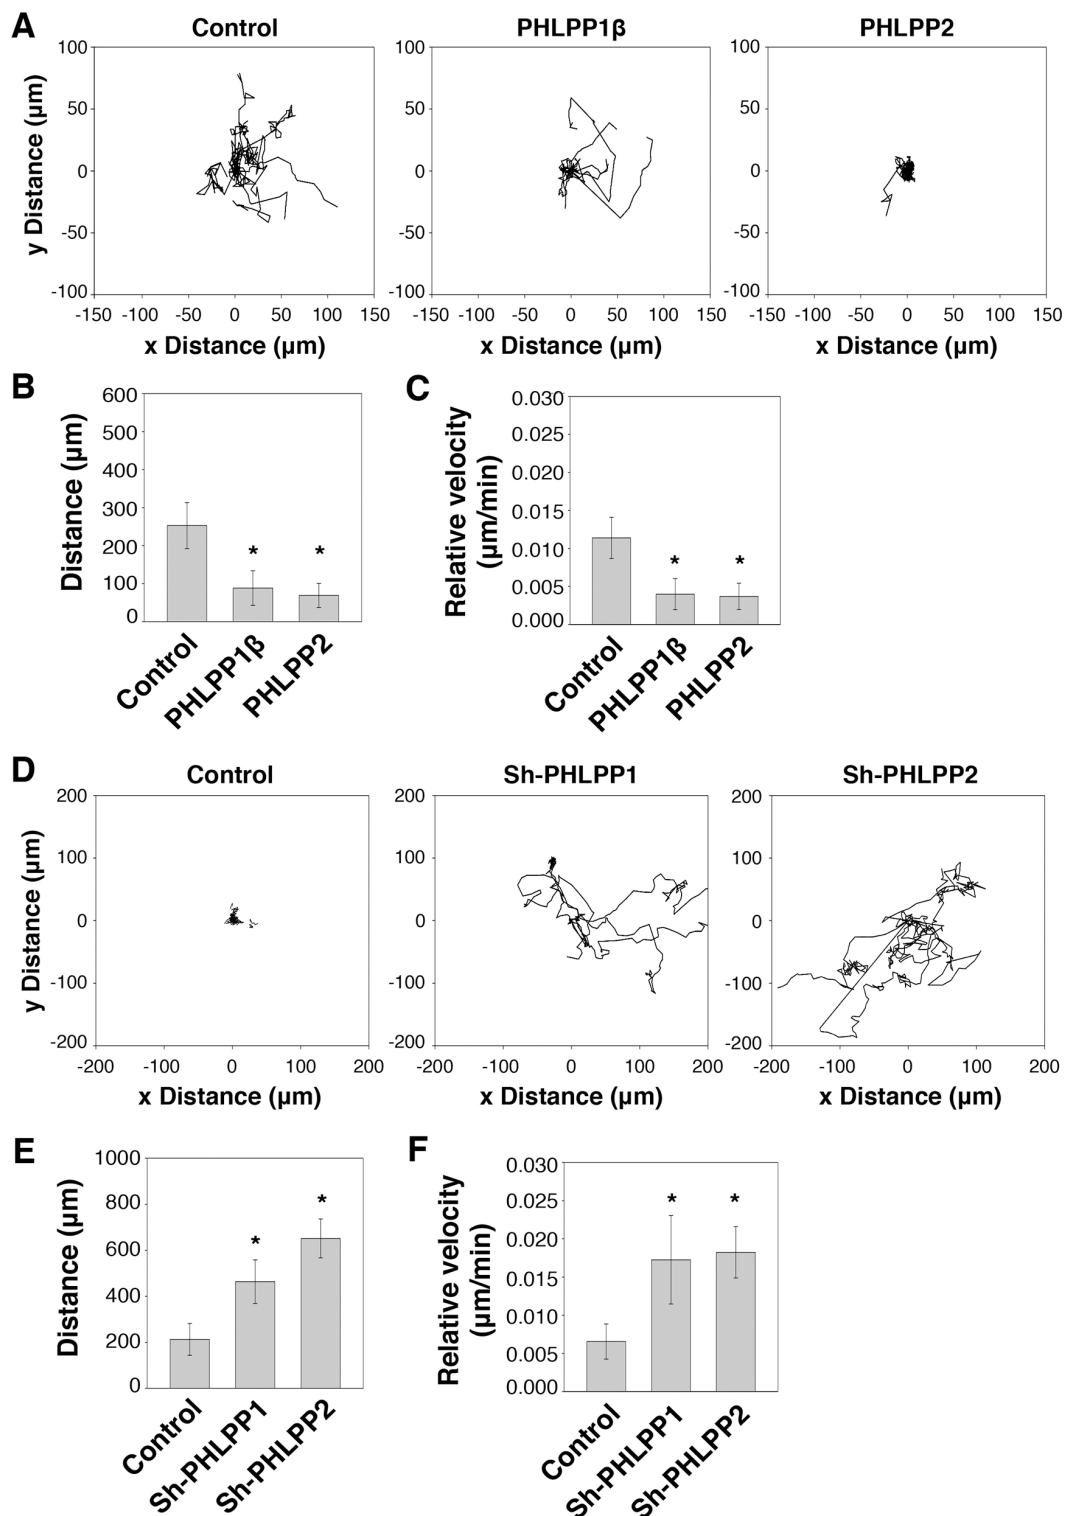

**Figure 4: PHLPP controls cell motility at the single cell level.** **A.** Migration patterns of stable control and PHLPP overexpressing Panc-1 cells on laminin coated plates using HGF as the chemoattractant. The trajectories of 12 randomly chosen cells for each cell line were plotted in the graphs. **B–C.** The average distance traveled (**B**) and the relative velocity (**C**) of 12 stable control and PHLPP overexpressing Panc-1 cells during 6 hours of migration. Data represent mean  $\pm$  SD ( $n = 12$  cells/line, \*  $p < 0.05$  by two-sample  $t$ -tests). **D.** Migration patterns of stable control and PHLPP knockdown ASPC-1 cells on laminin coated plates using HGF as the chemoattractant. The trajectories of 12 randomly chosen cells for each cell line were plotted in the graphs. **E–F.** The average distance traveled (**E**) and the relative velocity (**F**) of 12 stable control and PHLPP knockdown ASPC-1 cells during 6 hours of migration are shown. Data represent mean  $\pm$  SEM ( $n = 12$  cells/line, \*  $p < 0.05$  by two-sample  $t$ -tests).

## PHLPP inhibits the invasive growth of pancreatic cancer cells in 3D culture

To further determine the effect of PHLPP on invasive growth of pancreatic cancer cells, we used 3D cell culture systems as they closely mimic the cancer microenvironment and they provide a better opportunity to explore the effects of oncogenes and tumor suppressors on modulating morphogenesis as well as invasive growth [19, 20]. Both PHLPP overexpressing Panc-1 and PHLPP knockdown ASPC-1 cells were seeded into Matrigel and allowed to grow for up to 7 days. The control Panc-1 cells grew into large multi-globular clusters with spikes of membrane protrusions extending into Matrigel (Figure 5A–5B).

However, the formation of membrane protrusions was completely blocked in PHLPP overexpressing cells and the size of cell clusters was significantly decreased (Figure 5C). In addition, TIRF images of control Panc-1 cells showed the formation of both stress fibers and long filamentous extensions at the basolateral membrane surrounding the entire cell whereas very few actin stress fibers were observed in PHLPP overexpressing cells (Supplementary Figure S2). Although no clear membrane protrusions were observed in ASPC-1 cells grown in Matrigel, PHLPP knockdown cells formed significantly larger globular clusters compared to the control cells, suggesting that PHLPP-loss increases the invasive growth ability of pancreatic cancer cells (Figure 6A–6C).

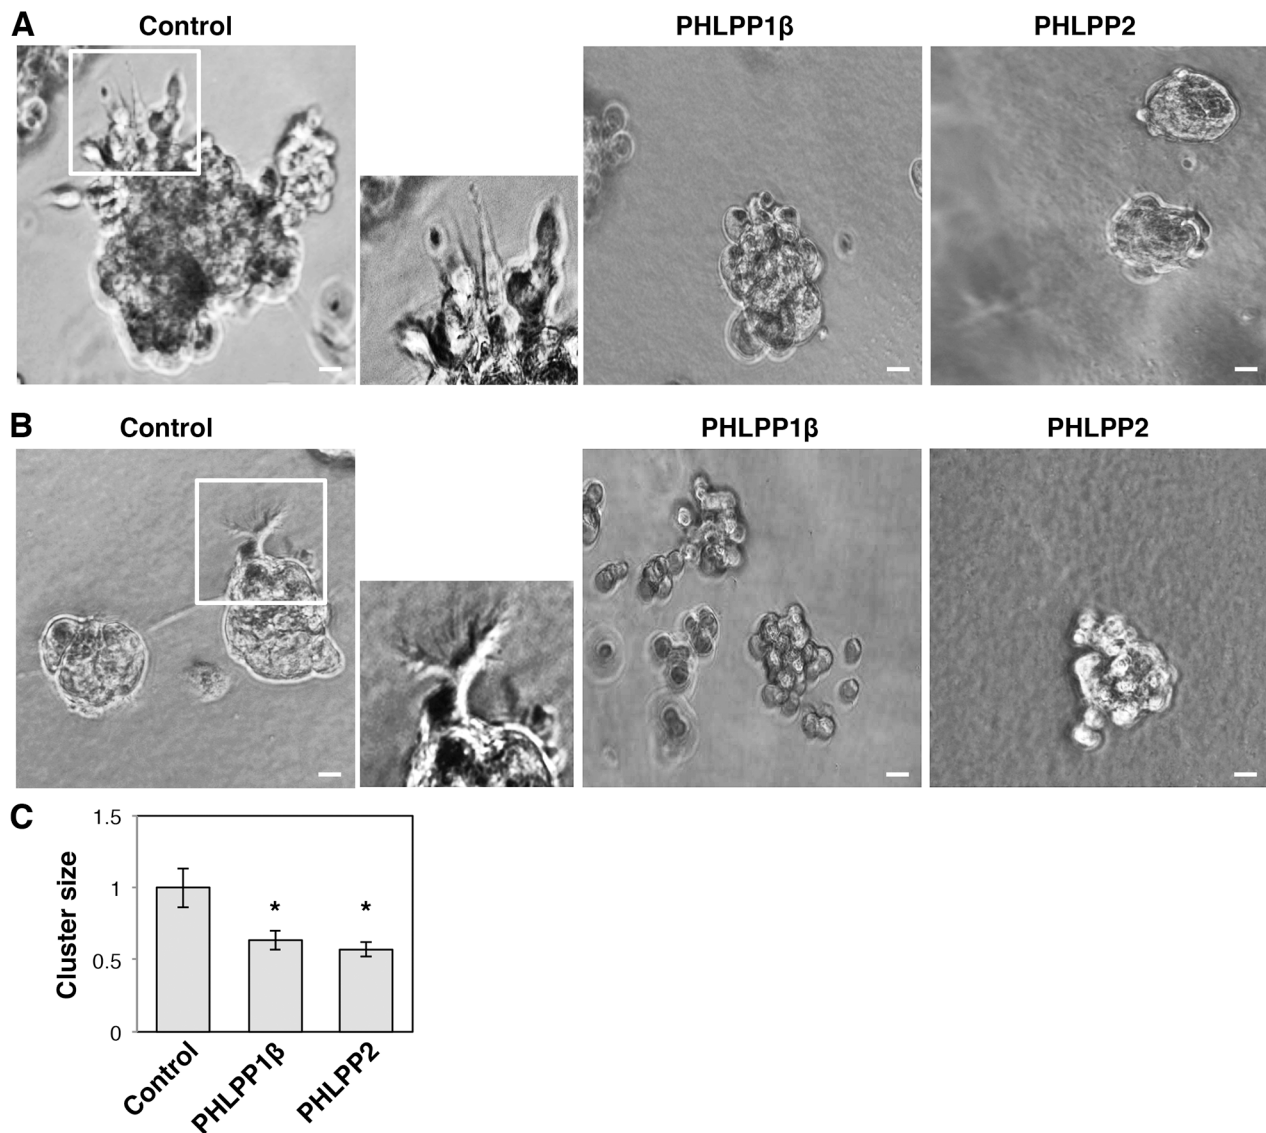

**Figure 5: PHLPP inhibits the invasive phenotype of pancreatic cancer cells grown in 3D culture.** A–B. Stable control and PHLPP overexpressing Panc-1 cells were seeded in Matrigel and allowed to grow for 7 days. On the 3rd day (A) and the 7th day (B) after seeding phase-contrast images were taken with the 10X objective on using an inverted Nikon microscope. The boxed regions were enlarged and shown next to the original images. Scale bars, 100  $\mu$ m. C. The size of cell clusters at day 7 was measured and analyzed using Nikon Element AR software. Data represent mean  $\pm$  SEM ( $n = 18$  cells/line, \*  $p < 0.05$  by two-sample  $t$ -tests).

## PHLPP regulates the expression of integrin in pancreatic cancer cells

Previous studies have shown that increased  $\beta 4$  integrin expression is associated with pancreatic cancer progression [5]. Interestingly, when examining the expression of  $\beta$  integrin, we found that expression of

both  $\beta 4$  and  $\beta 1$  integrin were significantly reduced in PHLPP overexpressing Panc-1 cells and increased in the PHLPP knockdown ASPC-1 cells (Figure 7A–7C). To further determine if PHLPP-mediated regulation of  $\beta 4$  and  $\beta 1$  integrin expression is controlled at the transcriptional level, total RNAs were isolated from PHLPP overexpressing Panc-1 and PHLPP knockdown

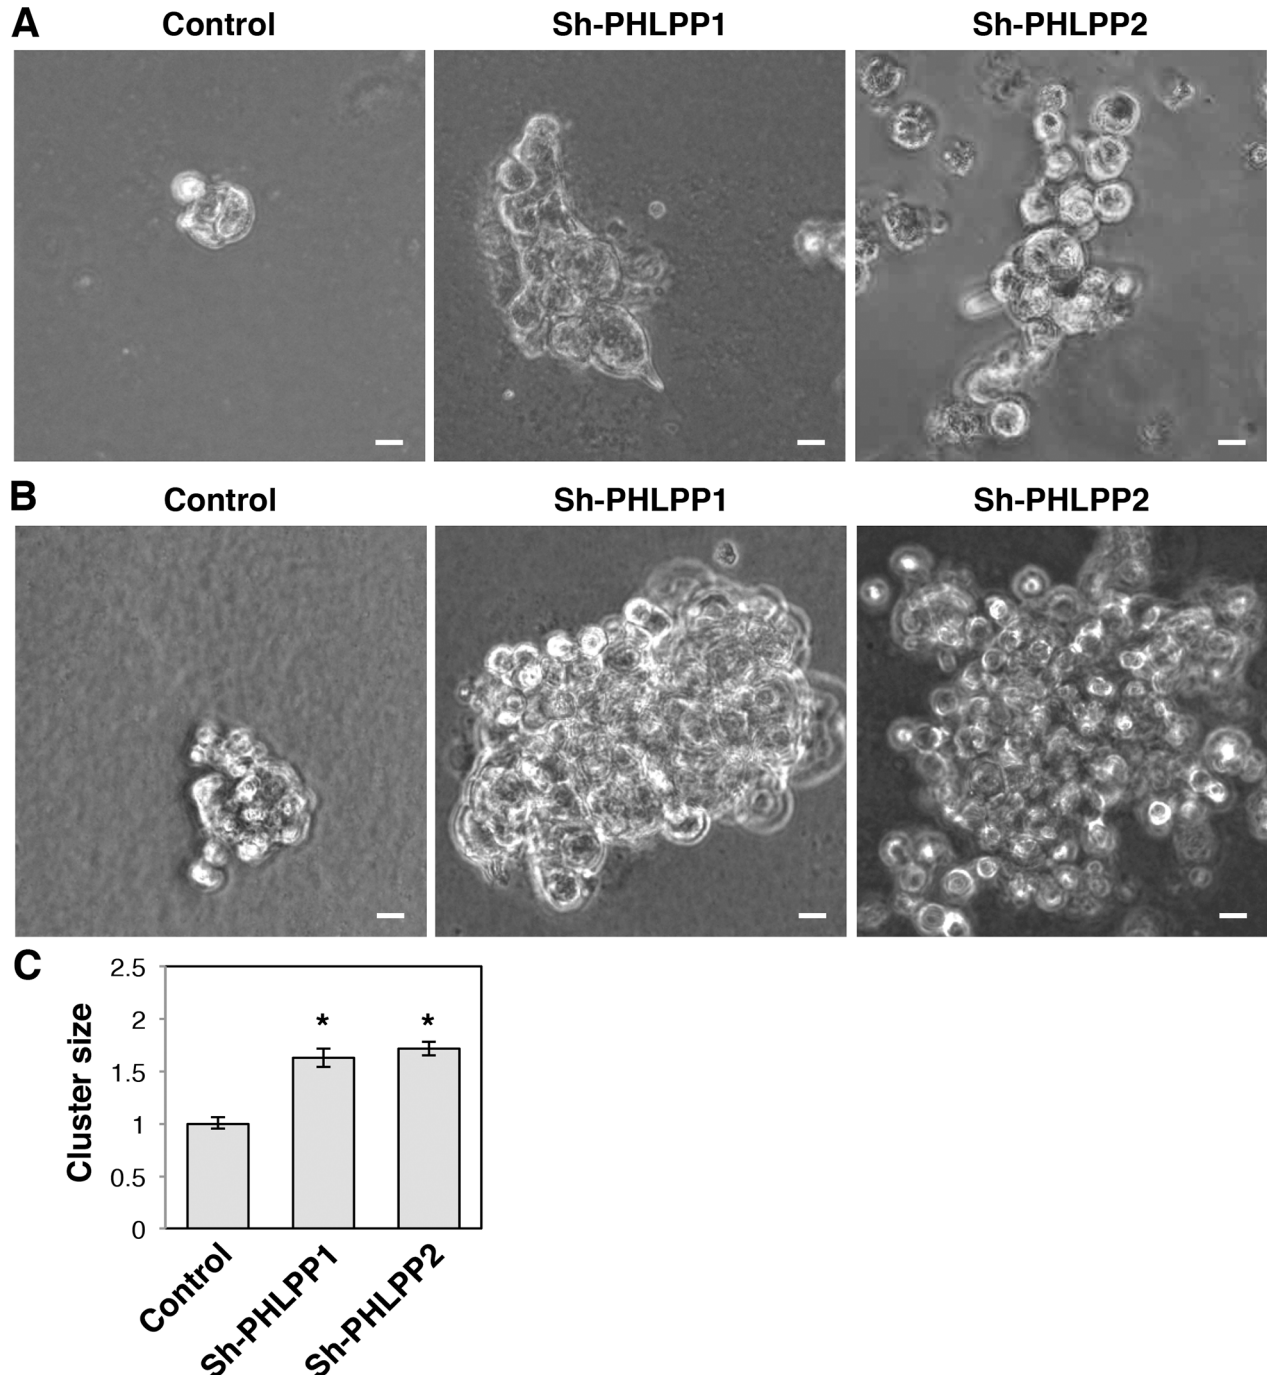

**Figure 6: Knockdown of PHLPP promotes the invasive growth of pancreatic cancer cells in 3D culture.** A–B. Stable control and PHLPP knockdown ASPC-1 cells were seeded in Matrigel and allowed to grow for 7 days. On the 5th day (A) and the 7th day (B) after seeding phase-contrast images were taken with the 10X objective on using an inverted Nikon microscope. Scale bars, 100  $\mu$ m. C. The size of cell clusters at day 7 was measured and analyzed using Nikon Element AR software. Data represent mean  $\pm$  SEM ( $n = 18$  cells/line, \*  $p < 0.05$  by two-sample  $t$ -tests).

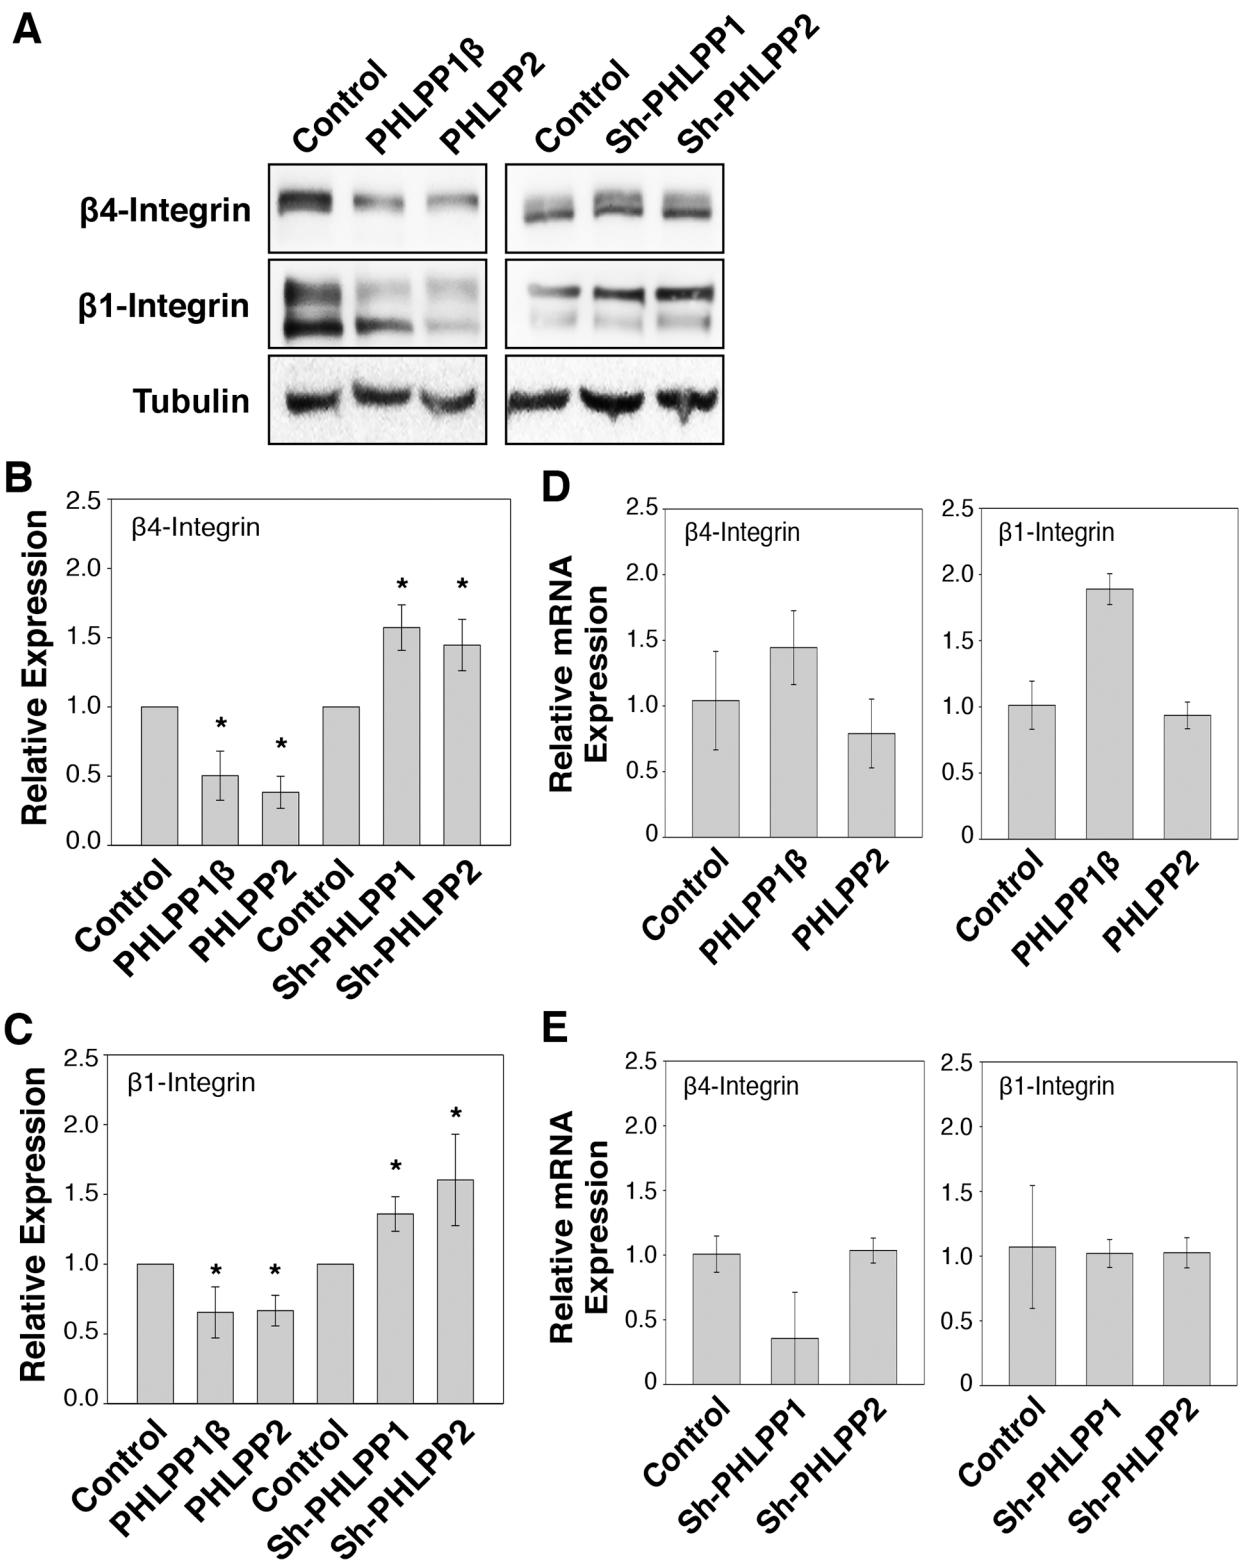

**Figure 7: PHLPP regulates integrin protein expression.** A. Cell lysates prepared from PHLPP overexpressing Panc-1 and PHLPP knockdown ASPC-1 cells were analyzed for the expression of  $\beta 1$  and  $\beta 4$  integrin and tubulin using immunoblotting. B–C. Relative expression of  $\beta 1$  (B) and  $\beta 4$  integrin (C) was calculated and normalized to tubulin. The level in control cells was set to 1. Data represent the mean  $\pm$  SEM ( $n = 3$ , \*  $p < 0.05$  by two-sample  $t$ -tests). D–E. Total RNAs were isolated from PHLPP overexpressing Panc-1 cells (D) and PHLPP knockdown ASPC-1 cells (E). Real-time PCR analysis was performed using probes specific for human  $\beta 1$  and  $\beta 4$  integrin genes. Each experimental point was done in triplicates, and the graphs represent the mean  $\pm$  SD ( $n = 3$ ).



ASPC-1 cells, and real-time PCR (RT-PCR) analysis was performed using probes specific for the  $\beta 4$  or  $\beta 1$  integrin gene. The results revealed that the mRNA levels of  $\beta 4$  and  $\beta 1$  integrin were not decreased by changes in PHLPP expression (Figure 7D–7E). Interestingly, the levels of  $\beta 4$  and  $\beta 1$  integrin mRNA were increased in PHLPP1 $\beta$  overexpressing cells. However, since the expression of  $\beta 4$  and  $\beta 1$  integrin proteins was decreased in PHLPP1 $\beta$  overexpressing cells, this increase of integrin mRNA was unlikely the reason for PHLPP-mediated downregulation of integrin. Collectively, these results indicated that PHLPP negatively regulates integrin expression via a post-translational mechanism in pancreatic cancer cells.

To further investigate the mechanism by which PHLPP regulates integrin expression, we tested if the PI3K/Akt or the MEK/ERK pathway is involved in controlling the expression of integrin proteins. Inhibiting the PI3K/Akt pathway using a PI3K inhibitor, LY294002, in ASPC-1 cells resulted in an approximately 40% reduction in both  $\beta 4$  and  $\beta 1$  integrin expression over time (Figure 8A–8B). A similar decrease of integrin expression was seen in cells treated with an Akt inhibitor, Akt-VIII (Supplementary Figure S3). However, treating cells with a MEK inhibitor, PD325901, had no effect on the expression of integrin (Supplementary Figure S3), suggesting that PHLPP-induced downregulation of integrin is likely mediated through inhibition of Akt signaling. As a control, we found that the mRNA levels of integrin were not significantly changed in cells treated with LY294002 (Supplementary Figure S3).

Recent studies have suggested that integrins can be internalized upon binding to extracellular matrix (ECM) ligands and trafficked to lysosome for degradation [21–24]. To determine if decreased integrin expression seen in PHLPP overexpressing cells is due to increased lysosomal degradation, we incubated control and PHLPP overexpressing Panc-1 cells in  $\text{NH}_4\text{Cl}$  containing media. The presence of  $\text{NH}_4\text{Cl}$ , a lysosomotropic alkalinizing agent, inhibits lysosomal protein degradation. At the end of 8-hour treatment with  $\text{NH}_4\text{Cl}$ , both  $\beta 4$  and  $\beta 1$  integrin expression increased in response to lysosome inhibition and the expression of integrin in PHLPP overexpressing cells was similar to that of the control cells (Figure 8C). Similar results were obtained in cells treated with a different lysosome inhibitor, chloroquine (Supplementary Figure S3). In addition, we determined if PHLPP promotes integrin ubiquitination since ubiquitination has been linked to lysosome-mediated degradation of integrin [21, 24]. Endogenous  $\beta 4$  and  $\beta 1$  integrin were immunoprecipitated from control and PHLPP overexpressing Panc-1 cells, and the ubiquitination levels of  $\beta 4$  and  $\beta 1$  integrin were increased in both PHLPP1 $\beta$  and PHLPP2 overexpressing cells (Figure 8D). Furthermore, since it has been shown that activation of PI3K/Akt signaling promotes integrin recycling to the plasma membrane by inhibiting GSK-3 $\beta$  [25], we examined if PHLPP-mediated downregulation

of integrin can be rescued by inhibiting GSK-3 activity directly. Indeed, when treating cells with LiCl, a GSK-3 inhibitor, the expression of  $\beta 1$  and  $\beta 4$  integrin increased in both control and PHLPP overexpressing cells (Supplementary Figure S4). Taken together, our results suggest that PHLPP may downregulate  $\beta 4$  and  $\beta 1$  integrin expression by increasing the ubiquitination of these proteins, and inhibition of lysosome-mediated protein degradation rescues integrin expression in PHLPP overexpressing cells.

### **Blocking integrin activity inhibits PHLPP-loss induced increase in cell motility**

To determine the functional impact of PHLPP-mediated inhibition of integrin expression, we examined the rate of cell migration in control and PHLPP knockdown ASPC-1 cells in the presence of blocking antibodies against  $\beta 4$  or  $\beta 1$  integrin. As shown in Figure 9A, incubating cells with either  $\beta 4$  or  $\beta 1$  integrin blocking antibodies significantly reduced cell migration in both control and PHLPP knockdown cells as measured by Transwell assays. Moreover, inhibiting integrin activation impaired cell motility at the single cell level as the relative velocity in the control and PHLPP knockdown cells became indistinguishable after the blocking antibody treatment (Figure 9B). These data suggested that increased integrin expression in PHLPP knockdown cells is responsible for increased cell migration.

## **DISCUSSION**

A number of recent studies have provided strong evidence suggesting that PHLPP serves as an important tumor suppressor in various cancer types [9, 10, 12, 15–17, 26]. For example, it has been shown that PHLPP is downregulated in colon cancer patients and decreased PHLPP expression promotes tumor growth as the result of increased activation of both PI3K/Akt and RAS/RAF oncogenic signaling [12, 13, 15]. However, the role of PHLPP in regulating cell migration has not been determined in pancreatic cancer. Here we show that PHLPP plays an important role in controlling cell motility. Specifically, overexpression of either PHLPP isoform decreases cell migration whereas knockdown of endogenous PHLPPs significantly enhances cell motility in pancreatic cancer cells. Moreover, the level of PHLPP expression negatively regulates the ability of pancreatic cancer cells to grow in 3D culture. This PHLPP-mediated inhibition of cell growth and migration is coincided with inhibition of both Akt and MEK/ERK activation. Mechanistically, PHLPP inhibits  $\beta 1$  and  $\beta 4$  integrin expression by increasing ubiquitination and lysosome-mediated degradation of integrin proteins, and blocking integrin activation reverses PHLPP-loss induced increase in cell migration. Consistent with a previously published

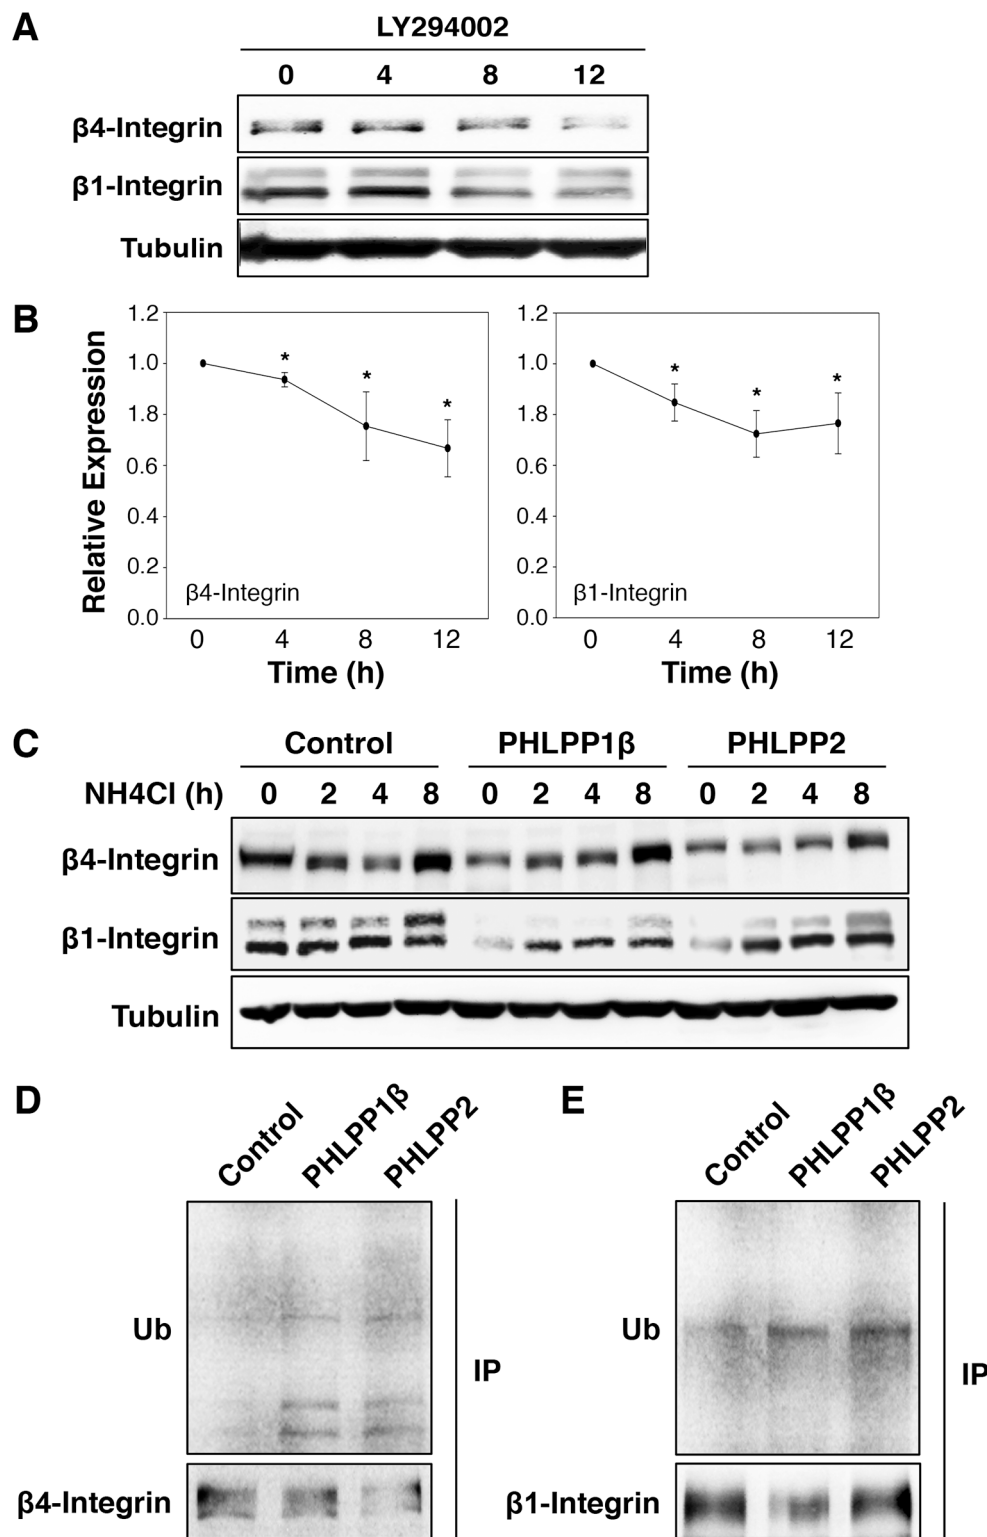

**Figure 8: Inhibition of PI3K/Akt pathway promotes lysosome-mediated integrin degradation.** **A.** ASPC-1 cells were incubated with LY294002 for 0–12 hours. At indicated time points, cell lysates were prepared and analyzed for the expression of  $\beta$ 1 and  $\beta$ 4 integrin and tubulin using immunoblotting. **B.** Relative expression levels of  $\beta$ 1 and  $\beta$ 4 integrin at different time points following LY294002 treatment in ASPC-1 cells were calculated and normalized to tubulin. The level in untreated cells was set to 1. Data represent the mean  $\pm$  SEM ( $n = 3$ , \*  $p < 0.05$  by two-sample  $t$ -tests). **C.** Stable control and PHLPP overexpressing Panc-1 cells were treated with NH<sub>4</sub>Cl (5 mM) for 2, 4, and 8 hours. Cell lysates were prepared and analyzed by immunoblotting for integrin expression. **D.** Cell lysates prepared from stable control and PHLPP overexpressing Panc-1 cells were immunoprecipitated with antibodies against  $\beta$ 1 or  $\beta$ 4 integrin. The ubiquitination of endogenous  $\beta$ 1 and  $\beta$ 4 integrin was detected using the anti-ubiquitin antibody.

study [14], we find that overexpression of PHLPP isoforms promote cell death but have little effect on proliferation in PDAC cells (data not shown). Taken together, our findings establish a novel link connecting PHLPP downregulation with enhanced integrin function in pancreatic cancer.

The cell surface delivery and endocytosis of integrins are dynamically regulated processes and fundamental for cell migration in wound healing and

during cancer cell metastasis [27, 28]. Like many cell surface receptors, integrins are known to undergo endo/exocytic cycles, in which they are internalized, trafficked through endosome, and then recycled back to the plasma membrane [7, 28–30]. This recycle process occurs rather efficiently as the degradation rates of integrins are generally very slow [24, 31], however, ligand-bound integrins can be ubiquitinated

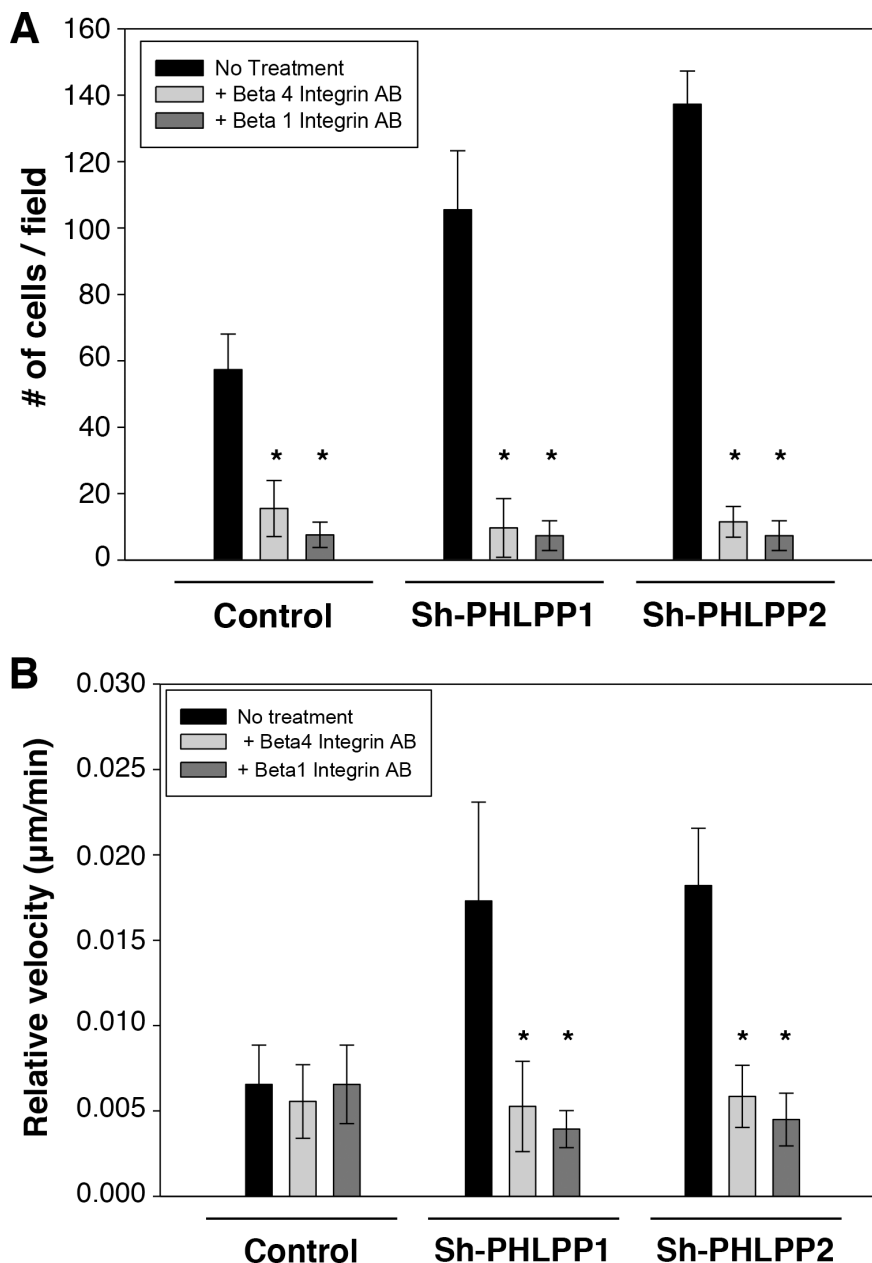

**Figure 9: The PHLPP-mediated regulation of cell migration relies on its ability to control integrin expression.** **A.** Stable control and PHLPP knockdown ASPC-1 cells were subjected to Transwell migration analysis using HGF as the chemoattractant. To block integrin activation, ASPC-1 cell suspensions were incubated with blocking antibodies of  $\beta 1$  or  $\beta 4$  integrin in serum-free media containing 1% BSA for 20 minutes at 4 °C. The cells were then seeded onto the collagen coated Transwells in the presence of the blocking antibodies and allowed to migrate for 4 hours at 37°C. Each experiment was done in duplicates and three independent experiments were averaged and expressed as mean  $\pm$  SEM (\*  $p < 0.01$  by two-sample  $t$ -tests compared to the control cells). **B.** Cells as treated as above with blocking antibodies were monitored for single cell motility using time-lapse imaging. The cells were allowed to migrate in response to HGF for 6 hours. The average velocities of 12 cells from each group are shown. Data represent mean  $\pm$  SEM ( $n = 12$  cells/line, \*  $p < 0.05$  by two-sample  $t$ -tests).

and sorted to lysosome for degradation by the ESCRT pathway [24, 32]. Our findings that overexpression of PHLPP reduces the expression of  $\beta 1$  and  $\beta 4$  integrin and enhances their ubiquitination suggest that PHLPP may negatively control cell motility by inhibiting Akt activity to promote lysosome-dependent degradation of integrin. Since preventing lysosome-mediated degradation of integrins increases recycling of integrins to the plasma membrane and enhances integrin-mediated cancer cell migration and invasion [29, 30], PHLPP represents a novel regulator of cell motility by controlling the balance of integrin recycling and degradation in pancreatic cancer cells.

Previous studies have shown that the protein expression of both PHLPP isoforms are reduced in pancreatic cancer patient specimens compared to normal pancreas tissues [14]. We have interrogated the mRNA expression of PHLPP in several gene expression databases and found that the expression of PHLPP1 is significantly decreased in pancreatic tumor samples compared to normal samples whereas PHLPP2 mRNA expression is less affected (Supplementary Figure S5). Thus, loss of PHLPP protein expression in pancreatic cancer is likely mediated via a post-transcriptional or post-translational mechanism. Interestingly, recent studies have identified PHLPP2 as a bona fide target for a number of oncogenic microRNAs (miRNAs), including miR-372, miR-224 and miR-17~92, in different cancer types [33–35]. In addition, single nucleotide variations in both PHLPP genes are rare (<1% based on COSMIC collections of somatic mutations). Future studies are needed to determine the mechanism leading to downregulation of PHLPP proteins.

Due to the late stage diagnosis and the aggressive nature of the carcinoma itself, PDAC patients have a very low survival rate [1, 4]. The treatment options for PDAC are few and surgical resection is nearly impossible for the average patient [36]. Understanding the molecular mechanism leading to EMT and progression of PDAC potentially has a long lasting benefit in creating new treatment strategies. In this study, we provide strong evidence supporting a tumor suppressor role of PHLPP in pancreatic cancer. Moreover, our finding that decreased PHLPP expression promotes EMT and cell motility through inhibiting lysosome degradation of integrin proteins identifies a novel mechanism by which PHLPP suppresses oncogenic signaling. Recent studies have demonstrated that upregulation of  $\beta 4$  integrin is associated with the EMT phenotype and poor prognosis in pancreatic cancer [37] and increased  $\beta 1$  integrin expression in tamoxifen-resistant breast cancer cells promotes EMT [38]. Future studies are needed to determine if PHLPP-loss induced EMT requires upregulation of integrin in PDAC cells. Collectively, our study highlights the importance of further exploring PHLPP as a possible diagnostic marker for targeted therapy in pancreatic cancer.

## EXPERIMENTAL PROCEDURES

### Cells and reagents

The following pancreatic ductal adenocarcinoma cell lines, including ASPC-1, Panc-1, and Suit-2, were kindly provided by Dr. Kathleen O'Connor (University of Kentucky). The Panc-1 cells used in this study were sorted for their high integrin expression as described previously [6]. Panc-1 cells were cultured in DMEM whereas ASPC-1 cells were cultured in RPMI-1640. All media were supplemented with 10% fetal bovine serum (FBS, Sigma-Aldrich) and 1% penicillin/streptomycin. The shRNAs used to knockdown human PHLPP1 or PHLPP2 gene and the retroviral expression plasmids, including pBabe-puro-HA-PHLPP1 $\beta$  and pBabe-puro-HA-PHLPP2, have been described previously [13, 15]. The stable PHLPP overexpressing cells were generated by infecting cells with retrovirus encoding HA-PHLPP1 $\beta$  or HA-PHLPP2 and selecting with puromycin (1  $\mu$ g/ml).

The PHLPP1 and PHLPP2 antibodies were obtained from Proteintech and Bethyl Laboratories, respectively. The phospho-Akt (p-Akt for the Ser473 site), phospho-ERK1/2 (p-ERK for Thr202/Tyr204), phospho-MEK1/2 (p-MEK for Ser217/221), and E-cadherin antibodies were from Cell Signaling. The vimentin antibody was from BD Biosciences, the  $\alpha$ -tubulin antibody was from Sigma-Aldrich, and the ubiquitin antibody was from Santa Cruz Biotechnology. The following integrin antibodies were used in this study: for Western blotting, anti- $\beta 1$  rabbit mAb (D2E5, Cell Signaling) and anti- $\beta 4$  mouse mAb (clone 7, BD Biosciences); and for blocking ECM binding and immunoprecipitation, anti- $\beta 1$  mouse mAb (clone 6S6, Millipore) and anti- $\beta 4$  mouse mAb (clone ASC-8, Millipore). The following chemicals, including PI3K inhibitor LY290042 and Akt inhibitor VIII, were purchased from EMD/CalBiochem. The MEK1/2 inhibitor PD0325901 was purchased from Selleck Chemicals, and lysosome inhibitor chloroquine was from Sigma-Aldrich.

### Immunoblotting

Cultured cells were harvested and lysed in Lysis Buffer (50 mM Na<sub>2</sub>HPO<sub>4</sub>, 1 mM sodium pyrophosphate, 20 mM NaF, 2 mM EDTA, 2 mM EGTA, 1% Triton X-100, 1 mM DTT, 200 mM benzamidine, 40 mg ml<sup>-1</sup> leupeptin, 200 mM PMSF) and the detergent-solubilized cell lysates were obtained after centrifugation for 5 minutes at 16,000 g at 4 °C. Equal amounts of cell lysates as determined by Bradford assays were resolved by SDS-PAGE and subjected to immunoblotting analysis. The density of ECL signals was obtained and quantified using a FluoChem digital imaging system (Alpha Innotech).

## Transwell migration assays

Serum starved pancreatic cancer cells were seeded into the upper chamber of Transwell inserts with an 8-mm pore size membrane (Corning). For migration assays, the bottom of the inserts were coated with collagen (15 mg/ml) or laminin (25 µg/ml), and the cells were allowed to migrate towards media containing either HGF (20 ng/ml) or IGF (20 ng/ml) in the lower chamber for 2-5 hours. At the end of the incubation period, Transwell inserts were fixed in methanol and stained with 0.5% crystal violet. The numbers of cells that were migrated to the lower chamber of the Transwell were counted using an inverted microscope at 20X magnification.

## Time-lapse live cell imaging and analysis

Stable control and PHLPP overexpressing Panc-1 cells and PHLPP knockdown ASPC-1 cells were serum starved for 2 hours and seeded as single cells onto collagen (15 mg/ml) or laminin (25 mg/ml) coated glass bottom culture dishes (MatTek). The migration of live cells was recorded in media containing HGF (20 ng/ml) using Nikon BioStation IM equipped with CO<sub>2</sub> incubation chamber. Time-lapse phase images were taken either every 5 or 10 minutes for 6 hours with a 20X objective. The movement of cells was tracked and analyzed using Nikon Element AR software.

## 3D cell culture

Single cell suspension of pancreatic cancer cells was prepared in serum free media and embedded into collagen/Matrigel (1:1) mixture. The cells were overlaid with 2% Matrigel in 2% FBS containing media. The cells were allowed to grow into cyst-like structures in the 3D matrix for 1-2 weeks. The size and morphology of the cysts were examined by phase-contrast microscopy using a Nikon Ti-E inverted microscope. For immunofluorescence staining, the cysts were fixed in 4% paraformaldehyde and permeabilized using 1% Triton X-100 in PBS. Actin was stained using Alexa 488-conjugated phalloidin while the nuclei of the cells were stained with DAPI-containing mounting medium. Cells were visualized using an Olympus FlowView FV1000 confocal laser-scanning microscope.

## Real-time PCR

Total RNA was isolated with RNeasy kit (Qiagen) from different stable pancreatic cancer cell lines. Equal amounts of RNA were used as templates for the synthesis of cDNA using High Capacity cDNA Reverse Transcription kit (Applied Biosystems). Real-time PCR reaction was performed using the StepOne Real-Time PCR system (Applied Biosystems) with β1- and β4-specific probes. All values were normalized to the level of β-actin.

## Statistical analysis

Normalized microarray and patient clinical data from two pancreatic cancer studies [39, 40] were downloaded from the Oncomine database. The Badaea et al data [40] contain matched tumor and normal samples from 36 pancreatic cancer patients. The TCGA data [39] contain tumor samples from 65 pancreatic cancer patients and normal samples from 65 patients, within which 64 patients have both tumor and normal samples. Expression levels of multiple probes mapping to the same gene were averaged. Gene expressions from replicated tumor or normal samples for the same patient were also averaged. The paired *t*-test or linear mixed model was used to compare PHLPP1 and PHLPP2 expressions between tumor and normal samples.

## CONFLICTS OF INTEREST

The authors have no conflicts in association with publication of this manuscript.

## GRANT SUPPORT

This work was supported by NIH R01CA133429 (TG). The studies were supported by Biostatistics Shared Resources of the University of Kentucky Markey Cancer Center (P30CA177558). We thank Garretson Epperly for providing technical support for this study.

## REFERENCES

1. Ryan DP, Hong TS and Bardeesy N. Pancreatic adenocarcinoma. *N Engl J Med.* 2014; 371:2140–2141.
2. Hidalgo M. New insights into pancreatic cancer biology. *Ann Oncol.* 2012; 23 Suppl 10:x135–138.
3. Hruban RH, Maitra A, Schlick R, Laheru D, Herman J, Kern SE and Goggins M. Emerging molecular biology of pancreatic cancer. *Gastrointest Cancer Res.* 2008; 2:S10–15.
4. Maitra A and Hruban RH. Pancreatic cancer. *Annu Rev Pathol.* 2008; 3:157–188.
5. Cruz-Monserrate Z, Qiu S, Evers BM and O'Connor KL. Upregulation and redistribution of integrin alpha6beta4 expression occurs at an early stage in pancreatic adenocarcinoma progression. *Mod Pathol.* 2007; 20:656–667.
6. Cruz-Monserrate Z and O'Connor KL. Integrin alpha 6 beta 4 promotes migration, invasion through Tiam1 upregulation, and subsequent Rac activation. *Neoplasia.* 2008; 10:408–417.
7. Desgrosellier JS and Cheresh DA. Integrins in cancer: biological implications and therapeutic opportunities. *Nat Rev Cancer.* 2010; 10:9–22.
8. Shields MA, Krantz SB, Bentrem DJ, Dangi-Garimella S and Munshi HG. Interplay between beta1-integrin and Rho

signaling regulates differential scattering and motility of pancreatic cancer cells by snail and Slug proteins. *J Biol Chem.* 2012; 287:6218–6229.

9. Brognard J, Sierecki E, Gao T and Newton AC. PHLPP and a second isoform, PHLPP2, differentially attenuate the amplitude of Akt signaling by regulating distinct Akt isoforms. *Mol Cell.* 2007; 25:917–931.
10. Gao T, Furnari F and Newton AC. PHLPP: a phosphatase that directly dephosphorylates Akt, promotes apoptosis, and suppresses tumor growth. *Mol Cell.* 2005; 18:13–24.
11. Brognard J and Newton AC. PHLiPPing the switch on Akt and protein kinase C signaling. *Trends Endocrinol Metab.* 2008; 19:223–230.
12. O'Neill AK, Niederst MJ and Newton AC. Suppression of survival signalling pathways by the phosphatase PHLPP. *FEBS J.* 2012.
13. Li X, Stevens PD, Liu J, Yang H, Wang W, Wang C, Zeng Z, Schmidt MD, Yang M, Lee EY and Gao T. PHLPP is a negative regulator of RAF1, which reduces colorectal cancer cell motility and prevents tumor progression in mice. *Gastroenterology.* 2014; 146:1301–1312 e1301–1310.
14. Nitsche C, Edderkaoui M, Moore RM, Eibl G, Kasahara N, Treger J, Grippo PJ, Mayerle J, Lerch MM and Gukovskaya AS. The phosphatase PHLPP1 regulates Akt2, promotes pancreatic cancer cell death, and inhibits tumor formation. *Gastroenterology.* 2012; 142:377–387 e371–375.
15. Liu J, Weiss HL, Rychahou P, Jackson LN, Evers BM and Gao T. Loss of PHLPP expression in colon cancer: role in proliferation and tumorigenesis. *Oncogene.* 2009; 28:994–1004.
16. Qiao M, Wang Y, Xu X, Lu J, Dong Y, Tao W, Stein J, Stein GS, Iglehart JD, Shi Q and Pardee AB. Mst1 is an interacting protein that mediates PHLPPs' induced apoptosis. *Mol Cell.* 2010; 38:512–523.
17. Molina JR, Agarwal NK, Morales FC, Hayashi Y, Aldape KD, Cote G and Georgescu MM. PTEN, NHERF1 and PHLPP form a tumor suppressor network that is disabled in glioblastoma. *Oncogene.* 2012; 31:1264–1274.
18. Qiu Y, Li X, Yi B, Zheng J, Peng Z, Zhang Z, Wu M, Shen F and Su C. Protein phosphatase PHLPP induces cell apoptosis and exerts anticancer activity by inhibiting Survivin phosphorylation and nuclear export in gallbladder cancer. *Oncotarget.* 2015. 6:19148-62. doi: 10.18632/oncotarget.3721
19. Debnath J, Muthuswamy SK and Brugge JS. Morphogenesis and oncogenesis of MCF-10A mammary epithelial acini grown in three-dimensional basement membrane cultures. *Methods.* 2003; 30:256–268.
20. Magudia K, Lahoz A and Hall A. K-Ras and B-Raf oncogenes inhibit colon epithelial polarity establishment through up-regulation of c-myc. *J Cell Biol.* 2012; 198:185–194.
21. Dozynkiewicz MA, Jamieson NB, Macpherson I, Grindlay J, van den Berghe PV, von Thun A, Morton JP, Gourley C, Timpson P, Nixon C, McKay CJ, Carter R, Strachan D, et al. Rab25 and CLIC3 collaborate to promote integrin recycling from late endosomes/lysosomes and drive cancer progression. *Dev Cell.* 2012; 22:131–145.
22. Margadant C, Kreft M, de Groot DJ, Norman JC and Sonnenberg A. Distinct roles of talin and kindlin in regulating integrin alpha5beta1 function and trafficking. *Curr Biol.* 2012; 22:1554–1563.
23. Draheim KM, Chen HB, Tao Q, Moore N, Roche M and Lyle S. ARRDC3 suppresses breast cancer progression by negatively regulating integrin beta4. *Oncogene.* 2010; 29:5032–5047.
24. Lobert VH, Brech A, Pedersen NM, Wesche J, Oppelt A, Malerod L and Stenmark H. Ubiquitination of alpha 5 beta 1 integrin controls fibroblast migration through lysosomal degradation of fibronectin-integrin complexes. *Dev Cell.* 2010; 19:148–159.
25. Roberts MS, Woods AJ, Dale TC, Van Der Sluijs P and Norman JC. Protein kinase B/Akt acts via glycogen synthase kinase 3 to regulate recycling of alpha v beta 3 and alpha 5 beta 1 integrins. *Mol Cell Biol.* 2004; 24:1505–1515.
26. Chen M, Pratt CP, Zeeman ME, Schultz N, Taylor BS, O'Neill A, Castillo-Martin M, Nowak DG, Naguib A, Grace DM, Murn J, Navin N, Atwal GS, et al. Identification of PHLPP1 as a Tumor Suppressor Reveals the Role of Feedback Activation in PTEN-Mutant Prostate Cancer Progression. *Cancer Cell.* 2011; 20:173–186.
27. Mellman I and Yarden Y. Endocytosis and cancer. *Cold Spring Harb Perspect Biol.* 2013; 5:a016949.
28. Maritzen T, Schachtner H and Legler DF. On the move: endocytic trafficking in cell migration. *Cell Mol Life Sci.* 2015; 72:2119–2134.
29. Roberts M, Barry S, Woods A, van der Sluijs P and Norman J. PDGF-regulated rab4-dependent recycling of alphavbeta3 integrin from early endosomes is necessary for cell adhesion and spreading. *Curr Biol.* 2001; 11:1392–1402.
30. Rainero E and Norman JC. Late endosomal and lysosomal trafficking during integrin-mediated cell migration and invasion: cell matrix receptors are trafficked through the late endosomal pathway in a way that dictates how cells migrate. *Bioessays.* 2013; 35:523–532.
31. Margadant C, Monsuur HN, Norman JC and Sonnenberg A. Mechanisms of integrin activation and trafficking. *Curr Opin Cell Biol.* 2011; 23:607–614.
32. Bottcher RT, Stremmel C, Meves A, Meyer H, Widmaier M, Tseng HY and Fassler R. Sorting nexin 17 prevents lysosomal degradation of beta1 integrins by binding to the beta1-integrin tail. *Nat Cell Biol.* 2012; 14:584–592.
33. Chen X, Hao B, Han G, Liu Y, Dai D, Li Y, Wu X, Zhou X, Yue Z, Wang L, Cao Y and Liu J. miR-372 regulates glioma cell proliferation and invasion by directly targeting PHLPP2. *J Cell Biochem.* 2015; 116:225–232.

34. Liao WT, Li TT, Wang ZG, Wang SY, He MR, Ye YP, Qi L, Cui YM, Wu P, Jiao HL, Zhang C, Xie YJ, Wang JX et al. microRNA-224 promotes cell proliferation and tumor growth in human colorectal cancer by repressing PHLPP1 and PHLPP2. *Clin Cancer Res.* 2013; 19:4662–4672.
35. Rao E, Jiang C, Ji M, Huang X, Iqbal J, Lenz G, Wright G, Staudt LM, Zhao Y, McKeithan TW, Chan WC and Fu K. The miRNA-17 approximately 92 cluster mediates chemoresistance and enhances tumor growth in mantle cell lymphoma via PI3K/AKT pathway activation. *Leukemia.* 2012; 26:1064–1072.
36. Heestand GM, Murphy JD and Lowy AM. Approach to patients with pancreatic cancer without detectable metastases. *J Clin Oncol.* 2015; 33:1770–1778.
37. Masugi Y, Yamazaki K, Emoto K, Effendi K, Tsujikawa H, Kitago M, Itano O, Kitagawa Y and Sakamoto M. Upregulation of integrin beta4 promotes epithelial-mesenchymal transition and is a novel prognostic marker in pancreatic ductal adenocarcinoma. *Lab Invest.* 2015; 95:308–319.
38. Yuan J, Liu M, Yang L, Tu G, Zhu Q, Chen M, Cheng H, Luo H, Fu W, Li Z and Yang G. Acquisition of epithelial-mesenchymal transition phenotype in the tamoxifen-resistant breast cancer cell: a new role for G protein-coupled estrogen receptor in mediating tamoxifen resistance through cancer-associated fibroblast-derived fibronectin and beta1-integrin signaling pathway in tumor cells. *Breast Cancer Res.* 2015; 17:69.
39. TCGA. The Cancer Genome Atlas <http://tcga-datancinihgov/tcga/>.
40. Badea L, Herlea V, Dima SO, Dumitrascu T and Popescu I. Combined gene expression analysis of whole-tissue and microdissected pancreatic ductal adenocarcinoma identifies genes specifically overexpressed in tumor epithelia. *Hepatology.* 2008; 55:2016–2027.
