# Supplementary material for: PHLPP negatively regulates cell motility through inhibition of Akt activity and integrin expression in pancreatic cancer cells
Source: PubMed Central journal article supplement (PMC4884955; doi:10.18632/oncotarget.6848), 2016-01-08
Supplement: oncotarget-07-7801-s001.pdf [file oncotarget-07-7801-s001.pdf]

## SUPPLEMENTARY FIGURES

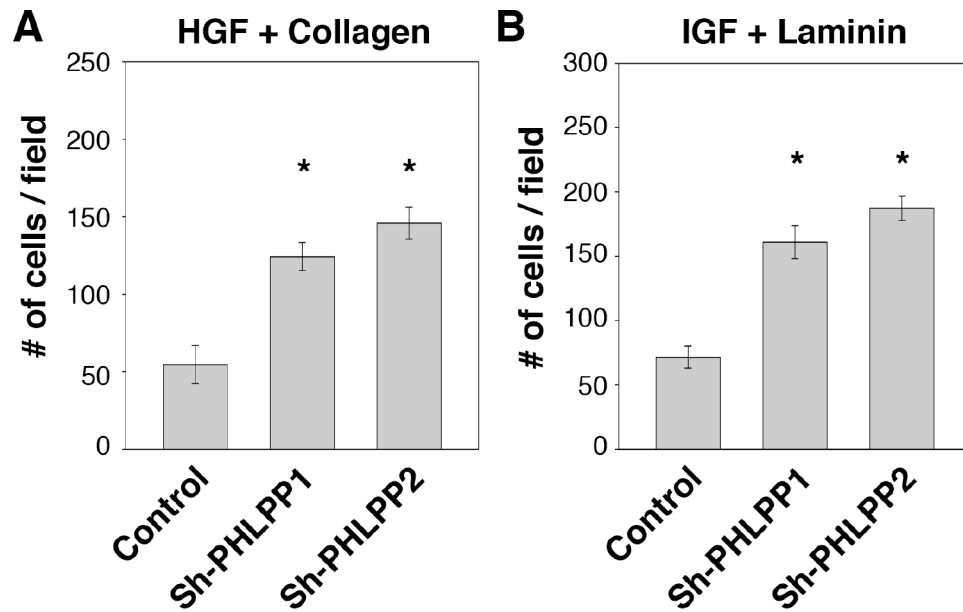

**Supplementary Figure S1: Knockdown of PHLPP expression promotes cell migration.** Stable control and PHLPP knockdown ASPC-1 cells were subjected to Transwell migration assays using either HGF and collagen **A.** or IGF-1 (20 ng/ml) and laminin **B.** as chemoattractants. Each experiment was done in duplicates and three independent experiments were averaged and expressed as mean  $\pm$  SD (\*  $p < 0.05$  by two-sample *t*-tests compared to the control cells).

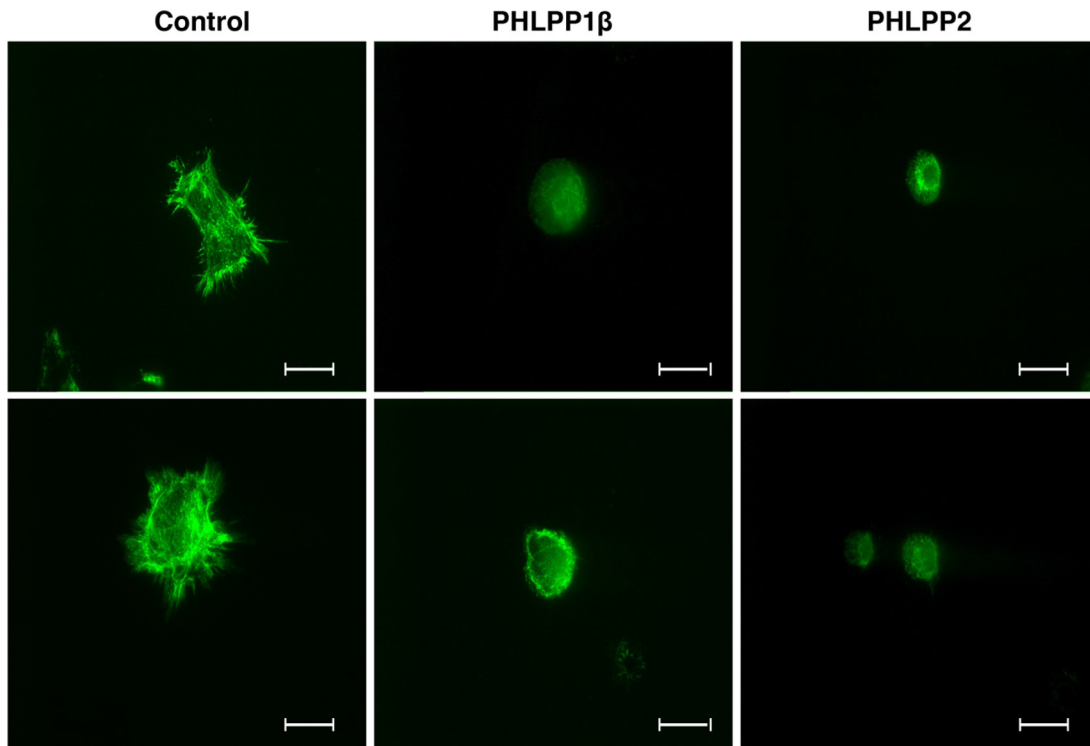

**Supplementary Figure S2: PHLPP affects actin cytoskeleton dynamic in pancreatic cancer cells.** Stable control and PHLPP overexpressing Panc-1 cells were seeded onto collagen coated cover slips in serum-free media. After 20 minutes of incubation at 37°C the cells were fixed with 4% paraformaldehyde, blocked with anti-goat serum and stained with Alexa488-phalloidin. TIRF images were from the basolateral membrane of the cells and two representative images are shown for each cell line (scale bars, 100  $\mu\text{m}$ ).

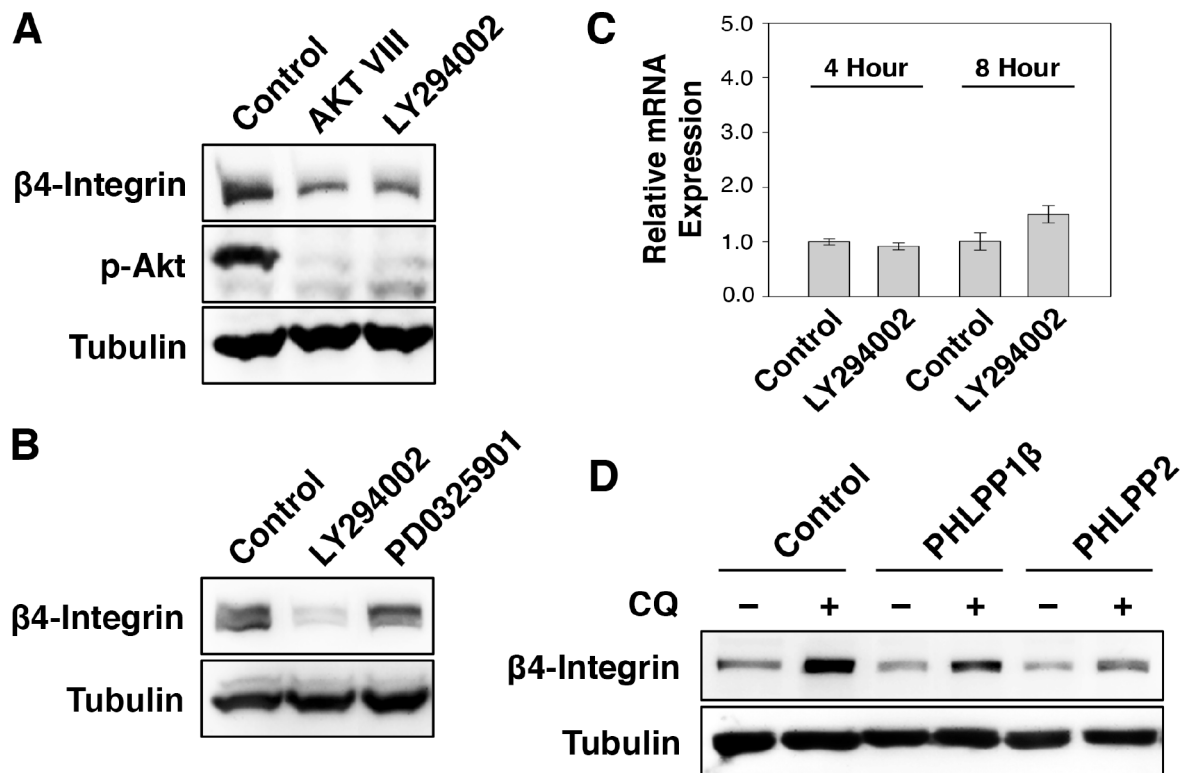

**Supplementary Figure S3: The effect of inhibiting PI3K/Akt and MEK/ERK signaling on the expression of integrins in pancreatic cancer cells.** **A.** ASPC-1 cells were incubated with DMSO, AKT inhibitor (AKT VIII, 0.5  $\mu$ M), or LY294002 (20  $\mu$ M) for 8 hours. Cell lysates were prepared and analyzed for the expression of  $\beta$ 4 integrin, p-AKT, and tubulin using immunoblotting. **B.** ASPC-1 cells were treated with DMSO, LY294002 (20  $\mu$ M) or PD0325901 (10 nM) for 16 hours. Cell lysates were prepared and analyzed for the expression of  $\beta$ 4 integrin and tubulin using immunoblotting. **C.** Panc-1 cells were treated with LY294002 (20  $\mu$ M) for 4 or 8 hours and total RNAs were extracted. Real-time PCR analysis was performed using probes specific for human  $\beta$ 4 integrin gene. Each experimental point was done in triplicates, and the graphs represent the mean  $\pm$  SD ( $n=3$ ). **D.** Stable control and PHLPP overexpressing Panc-1 cells were treated with Chloroquine (CQ, 20  $\mu$ M) for 4 hours. Cell lysates were prepared and analyzed by immunoblotting for  $\beta$ 4 integrin expression.

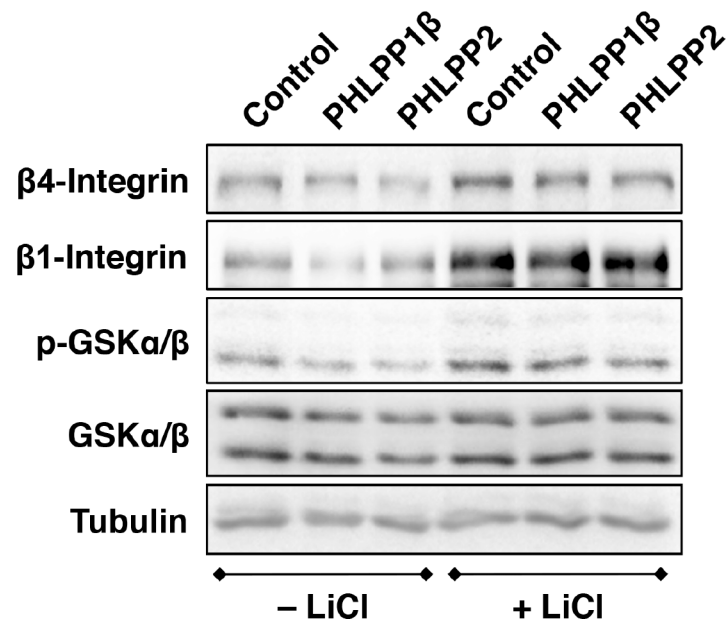

**Supplementary Figure S4: Inhibition of GSK3 activity increased integrin expression.** Stable control and PHLPP overexpressing Panc-1 cells were treated with GSK3 inhibitor LiCl (10 mM) for 24 hours. Cell lysates were prepared and analyzed for the expression of  $\beta 4$  and  $\beta 1$  integrin using immunoblotting. Note that overexpression of either PHLPP isoform decreased phosphorylation of GSK3 suggesting increased GSK3 activity.

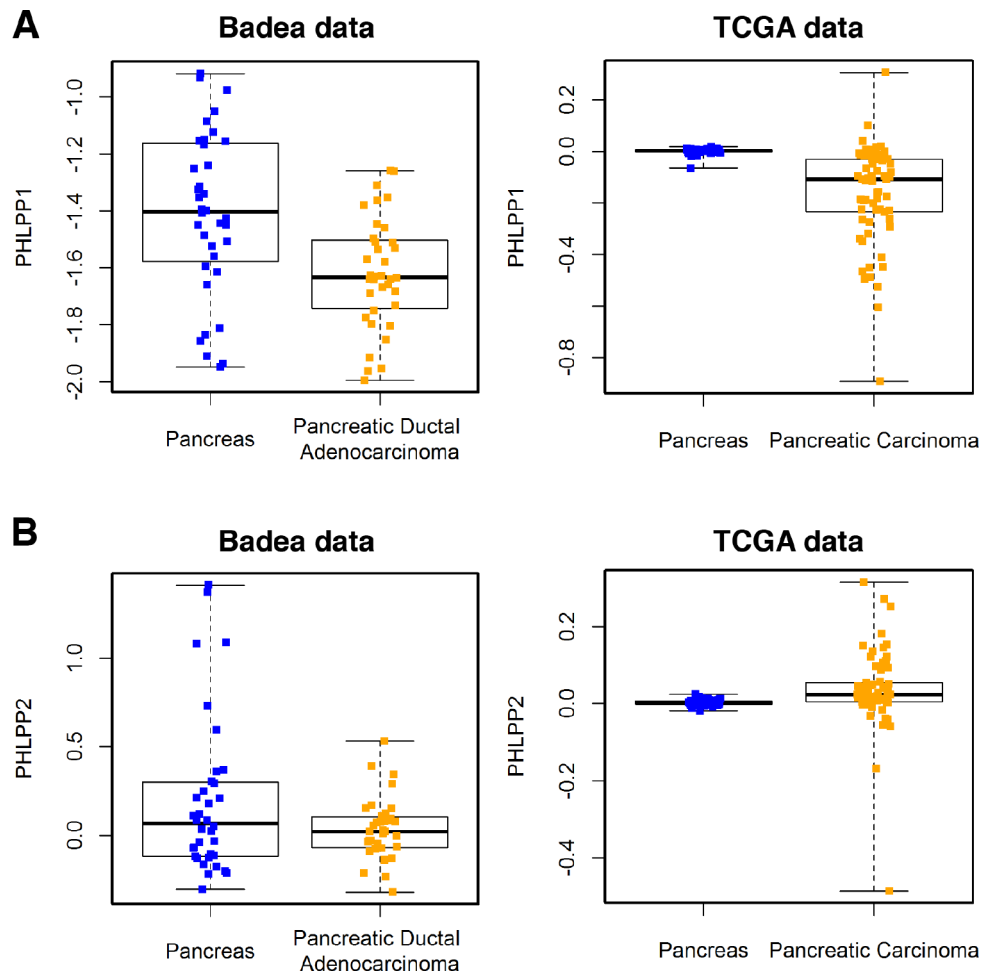

**Supplementary Figure S5: The expression of PHLPP1 and PHLPP2 gene in pancreatic cancer patient samples.** Expression of PHLPP1 was significantly lower in pancreatic tumor samples compared to normal samples in the data from Badaea et al. [1] ( $P < 0.001$  based on a paired  $t$ -test) and in the data from TCGA [2] ( $P < 0.001$  based on a linear mixed model). The association between PHLPP2 expression and pancreatic cancer was less clear. PHLPP2 was upregulated in tumor samples based on the TCGA data ( $P = 0.010$ ) but downregulated based on the Badaea et al. data ( $P = 0.04$ ).

## REFERENCES

1. Badaea L, Herlea V, Dima SO, Dumitrascu T, Popescu I. Combined gene expression analysis of whole-tissue and microdissected pancreatic ductal adenocarcinoma identifies genes specifically overexpressed in tumor epithelia. *Hepatology*. 2008; 55:2016–2027.
2. TCGA The Cancer Genome Atlas. <http://tcga-data.nci.nih.gov/tcga/>.
